# Supplementary material
Source: MDPI journal article supplement (https://www.mdpi.com/2673-9801/3/2/15)
Supplement: s1 [file s1]

# Comprehensive Assessment of the Antioxidant and Anticancer Potential of Selected Ethnobotanical Plants

Monoj Kumar Das <sup>1,\*</sup>, Neelu Singh <sup>2</sup> and Paulraj Rajamani <sup>2,\*</sup>

<sup>1</sup> Department of Molecular Biology and Biotechnology, Tezpur University, Napaam, Tezpur 784028, India

<sup>2</sup> School of Environmental Sciences, Jawaharlal Nehru University, New Delhi 110067, India

\* Correspondence: mgsmonoij@gmail.com or monojkd@tezu.ernet.in (M.K.D.); paulrajr@yahoo.in (P.R.)

**Qualitative Phytochemical screening.** The extracts were used for preliminary phytochemical screening with a battery of chemical tests for detection of organic constituents present. Small number of extracts were dissolved in distilled water and following tests were performed: Biuret and Millon's tests for proteins, Ninhydrin's test for amino acids, Salkowski and Liebermann-Burchard's reactions for steroids, Borntrager's test for anthraquinone glycosides, Shinoda and alkaline tests for flavonoid glycosides, and ferric chloride, lead acetate, potassium dichromate and dilute iodine tests for tannins and phenolics.

The different qualitative phytochemical screening tests were performed for establishing the chemical profile of the ethanolic extracts of (CAN, LEX, SES, DES, and CA). In the present investigation all the extracts of plant were analysed for the presence of alkaloids, carbohydrates, glycosides, sterols, phenolic compounds, resin, and flavonoids using standard procedures [1, 2]. The results pertaining to this investigation were presented in Table 1.

**Table 1.** Preliminary Phytochemical screening of the selected medicinal Plants

| Phytochemicals | Selected Plants |     |     |     |     |
|----------------|-----------------|-----|-----|-----|-----|
|                | CAN             | LEX | SES | DES | CA  |
| Phenolic       | +++             | +++ | +++ | +++ | +++ |
| Flavonoids     | +++             | +++ | +++ | +++ | +++ |
| Alkaloid       | +++             | +++ | +   | ++  | ++  |
| Resin          | +++             | +++ | +++ | +++ | +++ |
| Tannins        | +++             | +++ | +++ | +++ | +++ |
| Phytosterols   | ++              | ++  | +++ | ++  | +++ |
| Carbohydrates  | +++             | +++ | +++ | +++ | ++  |
| Proteins       | +++             | +++ | +++ | +++ | +++ |
| Amino acids    | +++             | +++ | +++ | +++ | +++ |
| Saponin        | ++              | ++  | +++ | ++  | ++  |
| fats & oils    | +++             | +++ | ++  | ++  | ++  |
| Glycosides     | -               | -   | -   | -   | -   |

'+' indicates the presence of constituents.

Based on the sensitivity of test it is classified in three types:

Within 5 min: + + +

Within 10 min: + +

Within 15 min: +

1. Kokate, C.K., A.P. Purohit, and S.B. Gokhale, *Pharmacognosy*. 2007: Nirali Prakashan.
2. Jeet, K., et al., *Pharmacognostic and phytochemical investigation of whole aerial part of *Argyrea nervosa**. Int J Biol Pharm Res, 2012. 3(5): p. 713-717.
